# Supplementary material
Source: publisher site journal article supplement (https://en-cdn.bio-protocol.org/attached/file/20200312/3566%20Appendix%201.docx)
Supplement: Supplementary file 1 [file 3566%20Appendix%201.docx]

**Appendix-1:** Recommended species to get query sequences from well annotated genomes

| Plant | *Arabidopsis thaliana* | <https://phytozome.jgi.doe.gov/pz/portal.html> |
| --- | --- | --- |
| *Oryza sativa* | <https://phytozome.jgi.doe.gov/pz/portal.html> |
| *Amborella trichopoda* | <https://phytozome.jgi.doe.gov/pz/portal.html> |
| *Picea abies* | <http://congenie.org/> |
| *Physcomitrella patens* | <https://phytozome.jgi.doe.gov/pz/portal.html> |
| *Marchantia polymorpha* | <https://phytozome.jgi.doe.gov/pz/portal.html> |
| *Chara braunii* | <https://bioinformatics.psb.ugent.be/orcae/overview/Chbra> |
| *Klebsormidium nitens* | <http://www.plantmorphogenesis.bio.titech.ac.jp/~algae_genome_project/klebsormidium/> |
| Animals | *Homo sapiens* | UniProt: UP000005640 |
| *Mus musculus* | UniProt: UP000000589 |
| *Gallus gallus* | UniProt: UP000000539 |
| *Strongylocentrotus purpuratus* | UniProt: UP000007110 |
| *Caenorhabditis elegans* | UniProt: UP000001940 |
| *Drosophila melanogaster* | UniProt: UP000000803 |
| Fungi | *Aspergillus nidulans* | <https://mycocosm.jgi.doe.gov/mycocosm/home> |
| *Schizosaccharomyces pombe* |
| *Saccharomyces cerevisiae* |
| *Agaricus bisporus* |
| *Mortierella elongate* |
| *Rhizoclosmatium globosum* |
| Protozoa | *Dictyostelium discoideum* | UniProt: UP000002195 |
| *Entamoeba histolytica* | UniProt: UP000001926 |
| *Leishmania major* | UniProt: UP000000542 |
| *Monosiga brevicollis* | UniProt: UP000001357 |
| *Trypanosoma brucei* | UniProt: UP000008524 |
